# Supplementary material
Source: Springer Nature journal article supplement (https://www.springermedizin.de/resource/supplementary/12916_2010_286_MOESM6_ESM.pdf/9599556)
Supplement: MOESM6 [file 9599556]

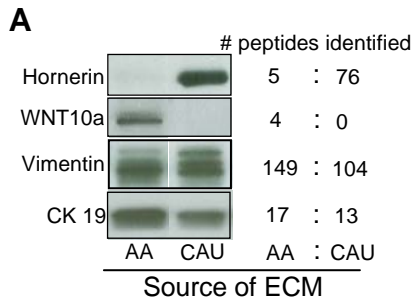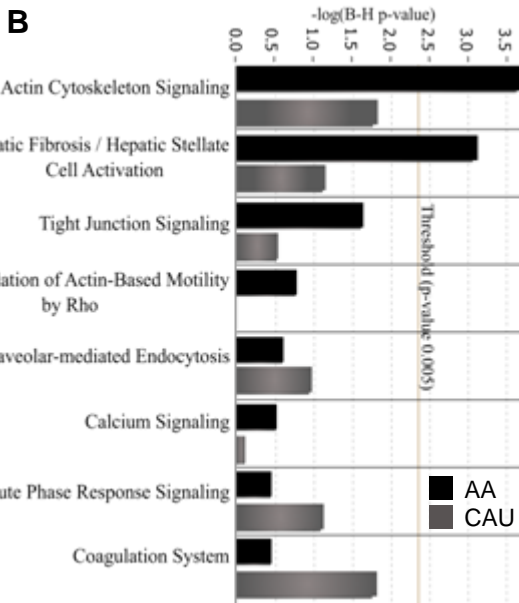

**C**

**African-American Network 1**

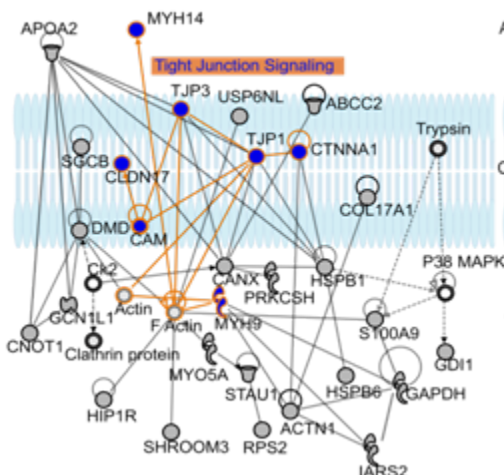

**Caucasian-American Network 1**

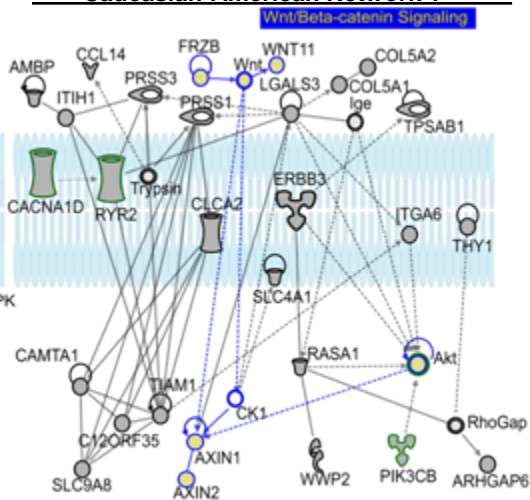

**Legend**

**Shapes**

- Enzyme
- Transporter
- Unknown
- Group
- Cytokine/Growth Factor
- Ion Channel
- Kinase
- Peptidase

- Relation - Protein/Protein or Protein/DNA
- Relation - Expression/Phosphorylation/Regulation of Binding/Activation

**Color**

- Wnt/Beta-catenin Signaling
- Not unique to AA or CA datasets
- Tight Junction Signaling
- Nitric Oxide Signaling
